# Supplementary material
Source: PubMed Central journal article supplement (PMC10403380)
Supplement: NIHMS1873324-supplement-Supplemental_Material.pdf [file NIHMS1873324-supplement-Supplemental_Material.pdf]

## Supplemental Material

### Growth Model Fit Indices

**Table 1**  
*Caregiver Depression*

|                             | AIC     | BIC     | Random Intercept Variance (% Change) | Random Slope Variance(% % Change) | -2*Log Likelihood | $\chi^2$ (df) | p     |
|-----------------------------|---------|---------|--------------------------------------|-----------------------------------|-------------------|---------------|-------|
| 1. Fully fixed              | 6281.94 | 6296.55 |                                      |                                   |                   | 42.48 (3)     |       |
| 2. Random intercept         | 5618.51 | 5637.99 | 26.53                                |                                   | 5610.51           | 665.43 (4)    | <.001 |
| 3. Random intercept & slope | 5569.40 | 5598.62 | 42.33 (59.54)                        | 0.19                              | 5557.40           | 53.11 (6)     | <.001 |

**Table 2**  
*Caregiver Anxiety*

|                             | AIC     | BIC     | Random Intercept Variance (% Change) | Random Slope Variance(% % Change) | -2*Log Likelihood | $\chi^2$ (df) | p     |
|-----------------------------|---------|---------|--------------------------------------|-----------------------------------|-------------------|---------------|-------|
| 1. Fully fixed              | 5125.21 | 5139.79 |                                      |                                   |                   | 13.24 (3)     |       |
| 2. Random intercept         | 4512.53 | 4531.97 | 8.65                                 |                                   | 4504.53           | 614.68 (4)    | <.001 |
| 3. Random intercept & slope | 4492.48 | 4521.64 | 10.55 (21.93)                        | .05                               | 4480.48           | 24.05 (6)     | <.001 |

**Table 3**  
*Caregiver PTSS*

|                             | AIC     | BIC     | Random Intercept Variance (% Change) | Random Slope Variance(% % Change) | -2*Log Likelihood | $\chi^2$ (df) | p     |
|-----------------------------|---------|---------|--------------------------------------|-----------------------------------|-------------------|---------------|-------|
| 1. Fully fixed              | 7921.86 | 7936.42 |                                      |                                   |                   | 46.13 (3)     |       |
| 2. Random intercept         | 7154.62 | 7174.04 | 175.10                               |                                   | 7146.62           | 769.24 (4)    | <.001 |
| 3. Random intercept & slope | 7117.77 | 7146.90 | 179.38 (2.44)                        | 1.00                              | 7105.77           | 40.85 (6)     | <.001 |

**Table 4**  
*Child Depression/Anxiety*

|                             | AIC     | BIC     | Random Intercept Variance (% Change) | Random Slope Variance(% % Change) | -2*Log Likelihood | $\chi^2$ (df) | p     |
|-----------------------------|---------|---------|--------------------------------------|-----------------------------------|-------------------|---------------|-------|
| 1. Fully fixed              | 6238.11 | 6252.66 |                                      |                                   |                   | 22.53 (3)     |       |
| 2. Random intercept         | 5696.15 | 5715.54 | 28.45                                |                                   | 5688.15           | 543.96 (4)    | <.001 |
| 3. Random intercept & slope | 5624.55 | 5653.65 | 28.24 (-.75)                         | 0.28                              | 5612.55           | 75.59 (6)     | <.001 |

**Table 5**  
*Child Externalizing*

|                             | AIC     | BIC     | Random Intercept Variance (% Change) | Random Slope Variance (% Change) | -2*Log Likelihood | $\chi^2$ (df) | p     |
|-----------------------------|---------|---------|--------------------------------------|----------------------------------|-------------------|---------------|-------|
| 1. Fully fixed              | 7275.42 | 7289.95 |                                      |                                  |                   | 17.95 (3)     |       |
| 2. Random intercept         | 6158.29 | 6177.69 | 104.40                               |                                  | 6150.29           | 1119.10 (4)   | <.001 |
| 3. Random intercept & slope | 6110.36 | 6139.46 | 125.62 (20.33)                       | .37                              | 6098.36           | 51.93 (6)     | <.001 |

**Table 6**  
*Child PTSS*

|                             | AIC     | BIC     | Random Intercept Variance (% Change) | Random Slope Variance (% Change) | -2*Log Likelihood | $\chi^2$ (df) | p     |
|-----------------------------|---------|---------|--------------------------------------|----------------------------------|-------------------|---------------|-------|
| 1. Fully fixed              | 6814.13 | 6828.73 |                                      |                                  |                   | 14.63 (3)     |       |
| 2. Random intercept         | 6223.59 | 6243.06 | 46.99                                |                                  | 6215.59           | 592.53 (4)    | <.001 |
| 3. Random intercept & slope | 6169.43 | 6198.64 | 63.83 (35.85)                        | .42                              | 6157.43           | 58.16 (6)     | <.001 |
